# Supplementary material for: Ultra-small dispersed CuxO nanoparticles on graphene fibers for miniaturized electrochemical sensor applications
Source: Royal Society of Chemistry journal article supplement (doi:10.1039/c9ra03802g), 2019-01-01
Supplement: c9ra03802g1.pdf [file c9ra03802g1.pdf]

## Supporting Information

# Ultra-small dispersed $\text{Cu}_x\text{O}$ nanoparticles on graphene fiber for miniaturized electrochemical sensor applications

Jinfeng Zeng<sup>a</sup>, Xiaoteng Ding<sup>b</sup>, Liwei Chen<sup>a</sup>, Le Jiao<sup>a</sup>, Yuze Wang<sup>a</sup>, Windle Christopher<sup>c</sup>, Qing Han<sup>\*a</sup> and Liangti Qu<sup>a</sup>

<sup>a</sup>Key Laboratory of Photoelectronic/Electrophotonic Conversion Materials, Key Laboratory of Cluster Science, Ministry of Education of China, School of Chemistry and Chemical Engineering, Beijing Institute of Technology, Beijing 100081, P. R. China.

<sup>b</sup>College of Life Sciences, Qingdao University, Qingdao 266071, P.R. China

<sup>c</sup>Solar Energy and Advanced Materials Group, Department of Chemical Engineering, University College London, Torrington Place, London, WC1E 7JE, UK.

E-mail: qhan@bit.edu.cn;

## Experimental Section

### Preparation of 0.1 M phosphate buffer (PBS, pH=7.0)

In a typical synthesis, 2.26816 g of  $\text{KH}_2\text{PO}_4$  was added to a beaker (250 mL), followed by 11.9380 g of  $\text{Na}_2\text{HPO}_4$ . The mixture was dissolved in about 200 mL of ultrapure water. Finally, the mixed solution was transferred to a volumetric flask (500 mL), diluted with ultrapure water to volume and mixed. The obtained PBS was stored at room temperature.

### Preparation of 5 mM potassium ferricyanide solution ( $\text{K}_3\text{Fe}[(\text{CN})_6]$ )

Typically, 1.86375 g of KCl powder (0.1 M) and 0.411560 g of  $\text{K}_3\text{Fe}[(\text{CN})_6]$  were dissolved in ultrapure water. The mixed solution was transferred to a 250 mL volumetric flask, diluted with ultrapure water to volume, and mixed. The obtained 5 mM  $\text{K}_3\text{Fe}[(\text{CN})_6]$  was stored at 4 °C.

### Measurement

The cyclic voltammetry (CV), differential pulse voltammetry (DPV) and amperometry were operated on a CHI 760E electrochemical workstation (CH Instruments, China) with a three-electrode system at room temperature, where  $\text{Cu}_x\text{ONPs}_{60}/\text{GF}_{400}$  acted as the working electrode, Pt plate as the counter electrode, and saturated calomel electrode as the reference electrode. 0.1 M PBS (pH 7.0) as electrolyte in the electrochemical experiments. All of the solutions were deoxygenated by bubbling  $\text{N}_2$  for 30 min before electrochemical measurements. CVs and DPVs were recorded in the potential range from -0.6 to 0.6 V at the scan rate of  $50 \text{ mV s}^{-1}$ . Amperometry was recorded in 10 mL  $\text{N}_2$  saturated PBS under magnetic stirring at -0.15 V. Oxygen dissolved in human serum and milk were removed with  $\text{N}_2$  for 30 min and 100  $\mu\text{L}$  of the human serum or milk was injected into 10 mL  $\text{N}_2$  saturated PBS by micro syringe. Appropriate  $\text{H}_2\text{O}_2$  (0.47, 0.60, 5.30, and 94.10  $\mu\text{M}$   $\text{H}_2\text{O}_2$ ) were then injected into the solution.

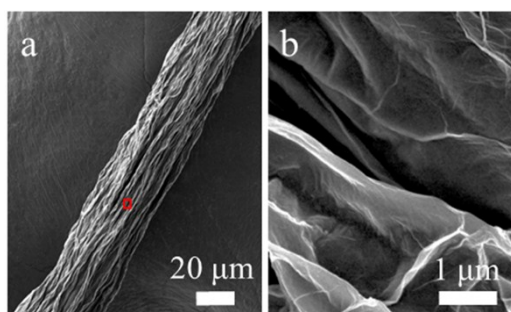

**Figure S1.** (a) SEM image of bare GF, (b) the enlarge view of the rectangle area in (a).

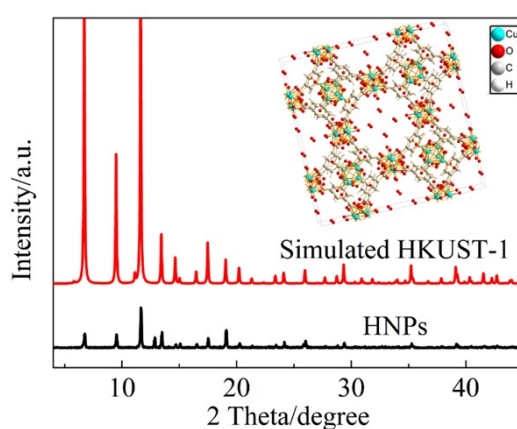

**Figure S2.** XRD patterns of HNPs and the simulated HKUST-1.

The XRD pattern of HNPs shows similar peaks to that of the simulated HKUST-1, suggesting the copper MOF of HKUST-1 with fourfold symmetry about 1 nm channels was prepared.<sup>1</sup>

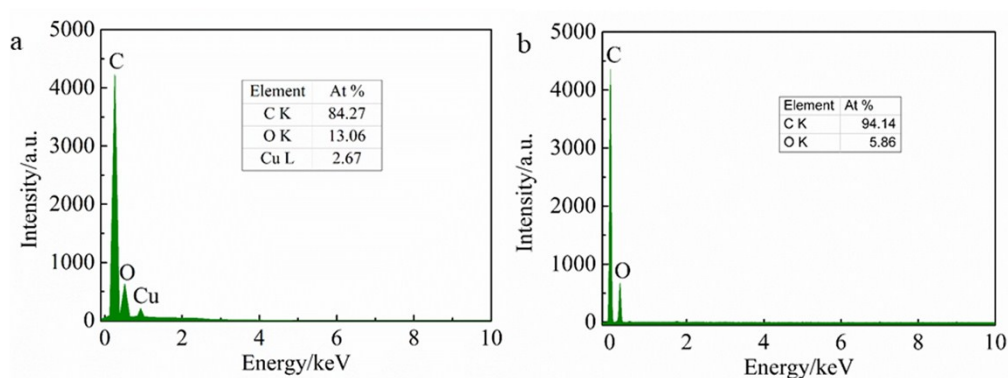

**Figure S3.** EDS spectrums of (a)  $\text{Cu}_x\text{ONPs}_{60}/\text{GF}_{400}$  and (b) bare GF.

**Table S1.** The element content (at %) of  $\text{Cu}_x\text{ONPs}_{30}/\text{GF}_{400}$ ,  $\text{Cu}_x\text{ONPs}_{60}/\text{GF}_{400}$ ,  $\text{Cu}_x\text{ONPs}_{90}/\text{GF}_{400}$  and  $\text{Cu}_x\text{ONPs}_{120}/\text{GF}_{400}$  determined by energy-dispersive X-ray spectroscopy (EDS).

| Sample                                         | C     | O     | Cu   |
|------------------------------------------------|-------|-------|------|
| $\text{Cu}_x\text{ONPs}_{30}/\text{GF}_{400}$  | 92.92 | 6.84  | 0.24 |
| $\text{Cu}_x\text{ONPs}_{60}/\text{GF}_{400}$  | 86.99 | 12.27 | 0.74 |
| $\text{Cu}_x\text{ONPs}_{90}/\text{GF}_{400}$  | 85.50 | 12.48 | 2.03 |
| $\text{Cu}_x\text{ONPs}_{120}/\text{GF}_{400}$ | 84.27 | 13.06 | 2.67 |

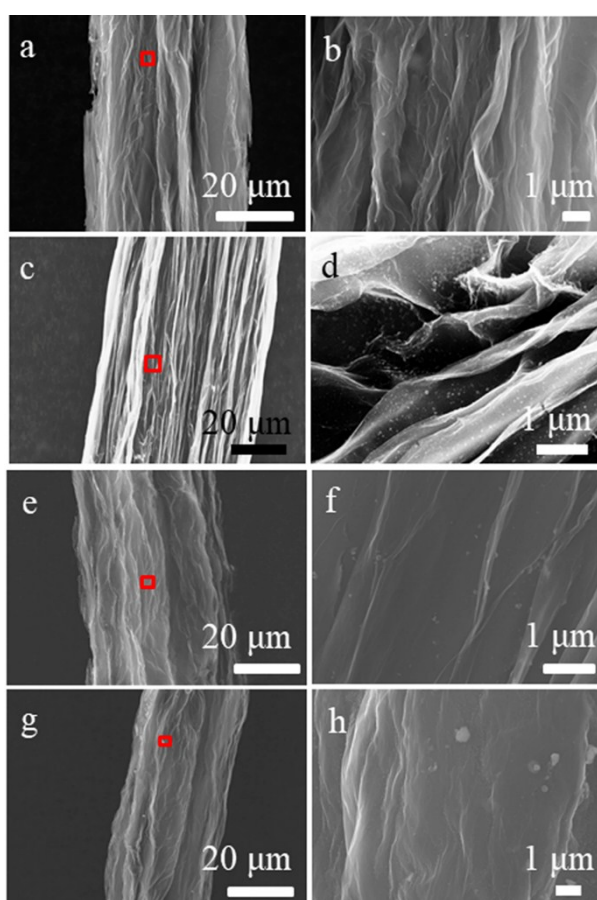

**Figure S4.** (a) SEM image of  $\text{HNP}_{30}/\text{GF}_{400}$ . (b) The enlarged view of the rectangle area in (a). (c) SEM image of  $\text{HNP}_{60}/\text{GF}_{400}$ . (d) The enlarged view of the rectangle area in (c). (e) SEM image of  $\text{Cu}_x\text{ONPs}_{90}/\text{GF}_{400}$ . (f) The enlarged view of the rectangle area in (e). (g) SEM image of  $\text{Cu}_x\text{ONPs}_{120}/\text{GF}_{400}$ . (h) The enlarged view of the rectangle area in (g).

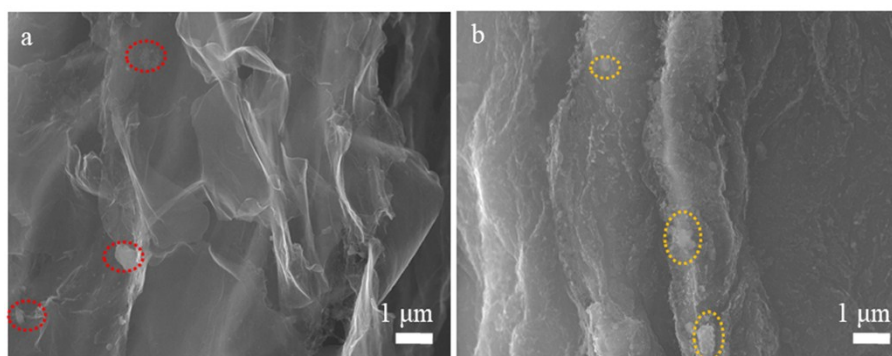

**Figure S5.** (a) SEM image of  $\text{Cu}_x\text{ONPs}_{60}/\text{GF}_{300}$ , the incomplete decomposition of  $\text{HNP}_{s60}$  precursors are in red circles, (b) SEM image of  $\text{Cu}_x\text{ONPs}_{60}/\text{GF}_{500}$ , agglomerations of  $\text{Cu}_x\text{ONPs}$  are in the yellow circles.

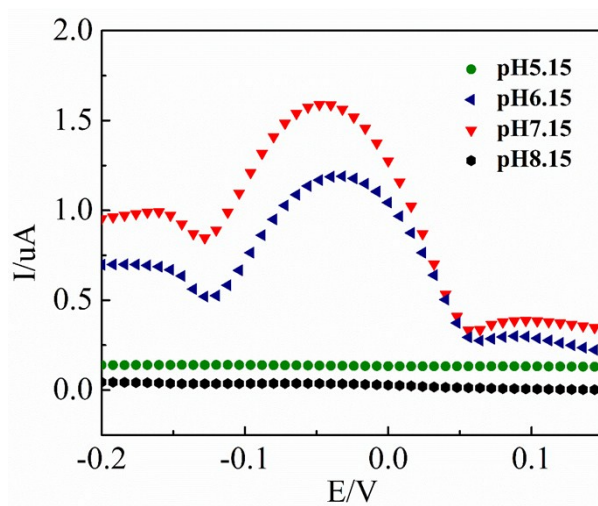

**Figure S6.** DPVs of the  $\text{Cu}_x\text{ONPs}_{60}/\text{GF}_{400}$  in 0.1 M PBS with 0.2 mM  $\text{H}_2\text{O}_2$  under pH values of 5.15, 6.15, 7.15 and 8.15.

**Table S2.** Comparison of various copper-based electrode sensors for H<sub>2</sub>O<sub>2</sub> detection

| Active material                                               | Linear range (μM) | Limit of detection (μM) | Sensitivity (mAmm <sup>-1</sup> cm <sup>-2</sup> ) | Electrode      | Method | Reference |
|---------------------------------------------------------------|-------------------|-------------------------|----------------------------------------------------|----------------|--------|-----------|
| {[Cu <sub>2</sub> (bep)(ada) <sub>2</sub> •H <sub>2</sub> O]} | 0.05-3            | 0.014                   | 5.56                                               | GCE            | I-t    | 2         |
| Cu@CuO                                                        | 3-800             | 210                     | ~                                                  | GCE            | DPV    | 3         |
| Cu <sub>2</sub> ONPs/N-GN                                     | 5-3750            | 0.8                     | 26.67                                              | GCE            | I-t    | 4         |
| Cu <sub>2</sub> O/GNs                                         | 300-7800          | 20.8                    | ~                                                  | GCE            | I-t    | 5         |
| Cu-MOF                                                        | 0.1-2.75          | 0.068                   | 78220                                              | GCE            | CV     | 6         |
| Cu <sub>2</sub> O/rGO                                         | 30-12800          | 21.7                    | 20.7                                               | GCE            | I-t    | 7         |
| CuO-SiNWs                                                     | 10-13180          | 1.6                     | 22.27                                              | GCE            | I-t    | 8         |
| Cu <sub>2</sub> O                                             | ~                 | 0.0039                  | 52.3                                               | GCE            | I-t    | 9         |
| CuO Nanosheet                                                 | 10-20000          | 10                      | 0.0255                                             | Cu foil        | I-t    | 10        |
| Cu-Ni(OH) <sub>2</sub>                                        | 5-145             | 1.5                     | 0.4081                                             | GCE            | I-t    | 11        |
| Cu <sub>x</sub> ONPs/GF                                       | 0.07-133          | 0.023                   | 3437.5                                             | graphene fiber | DPV    | This work |

Abbreviation: GCE: glass carbon electrode, I-t: amperometric, DPV: differential pulse voltammogram, CV: cyclic voltammograms.

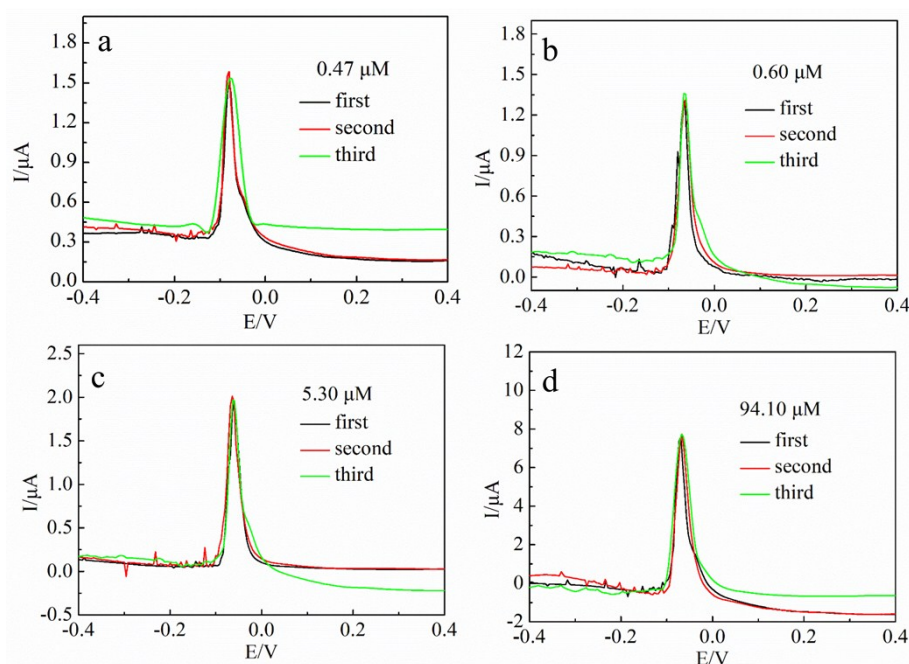

**Figure S7.** DPVs response of Cu<sub>x</sub>ONPs<sub>60</sub>/GF<sub>400</sub> electrode in diluted milk with 0.47, 0.60, 5.30, 94.10 μM H<sub>2</sub>O<sub>2</sub>, n=3. All potential values are -0.15 V and the pH value of PBS is 7.15. The real samples were diluted to 100 times with 0.1 M PBS solution, pH=7.15.

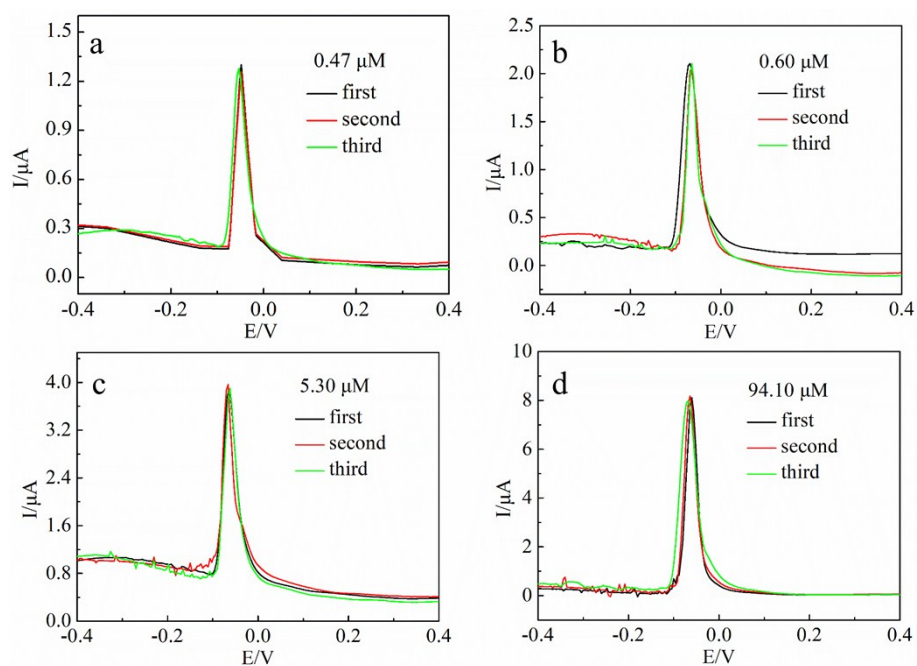

**Figure S8.** DPVs response of  $\text{Cu}_x\text{ONPs}_{60}/\text{GF}_{400}$  electrode in diluted human serum with 0.47, 0.60, 5.30, 94.10  $\mu\text{M}$   $\text{H}_2\text{O}_2$ ,  $n=3$ . All potential values are -0.15 V and the pH value of PBS is 7.15. The real samples were diluted to 100 times with 0.1 M PBS solution,  $\text{pH}=7.15$ .

## References

- 1 S. S. Y. Chui, S. M. F. Lo, J. P. H. Charmant, A. G. Orpen and I. D. Williams, *Science*, 1999, **283**, 1148-1150.
- 2 W. Meng, S. Xu, L. Dai, Y. Li, J. Zhu and L. Wang, *Electrochim. Acta*, 2017, **230**, 324-332.
- 3 H. Song, C. Ma, L. You, Z. Cheng, X. Zhang, B. Yin, Y. Ni and K. Zhang, *Microchim. Acta*, 2015, **182**, 1543-1549.
- 4 B. Jiang, X. Wei, F. Wu, K. Wu, L. Chen, G. Yuan, C. Dong and Y. Ye, *Microchim. Acta*, 2014, **181**, 1463-1470.
- 5 M. Liu, R. Liu and W. Chen, *Biosens. Bioelectron.*, 2013, **45**, 206-212.
- 6 C. Zhang, M. Wang, L. Liu, X. Yang and X. Xu, *Electrochem. Commun.*, 2013, **33**, 131-134.

- 7 F. Xu, M. Deng, G. Li, S. Chen and L. Wang, *Electrochim. Acta*, 2013, **88**, 59-65.
- 8 J. Huang, Y. Zhu, H. Zhong, X. Yang and C. Li, *ACS Appl. Mater. Inter.*, 2014, **6**, 7055-7062.
- 9 S. Li, Y. Zheng, G. W. Qin, Y. Ren, W. Pei and L. Zuo, *Talanta*, 2011, **85**, 1260-1264.
- 10 Y. K. Hsu, Y. C. Chen and Y. G. Lin, *Appl. Surf. Sci.*, 2015, **354**, 85-89.
- 11 A. Gu, G. Wang, J. Gu, X. Zhang and B. Fang, *Electrochim. Acta*, 2010, **55**, 7182-7187.
